# Supplementary material
Source: PubMed Central journal article supplement (PMC11105472)

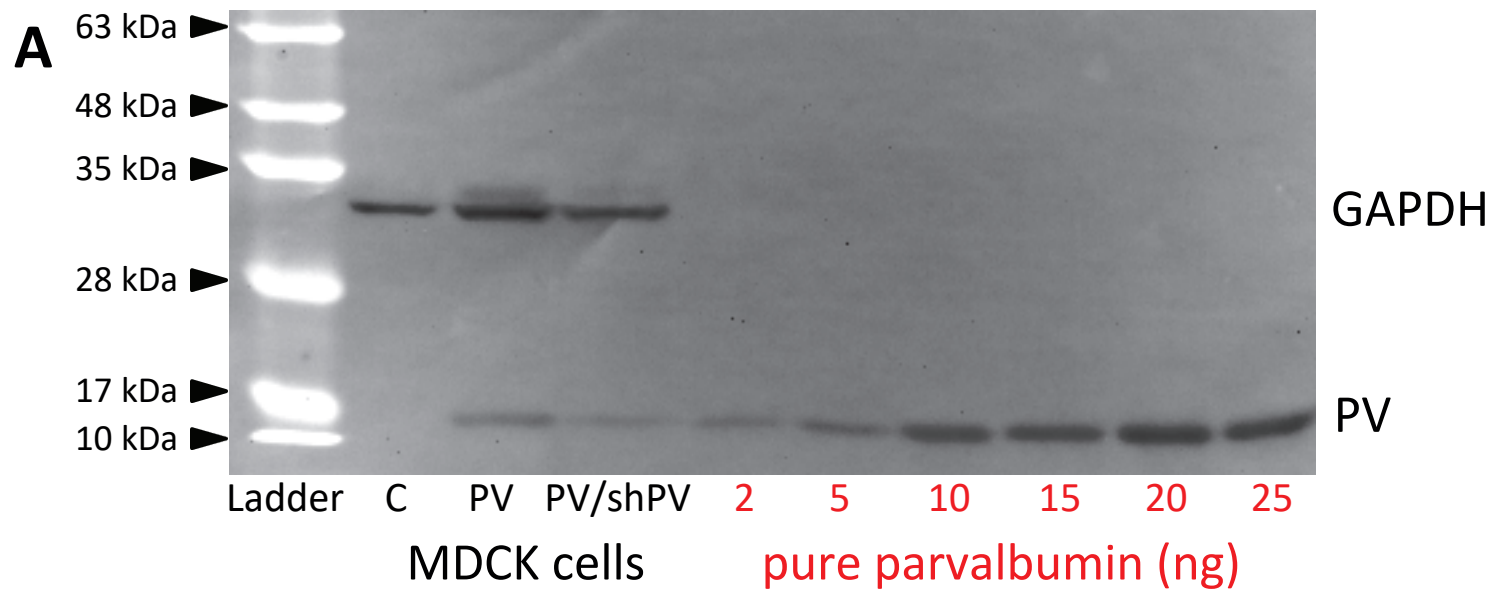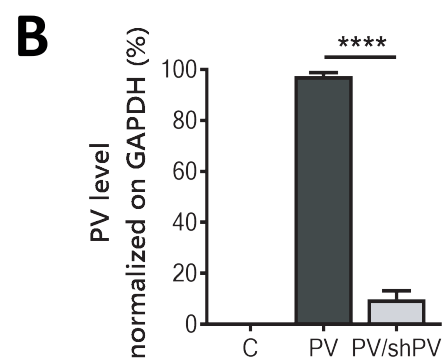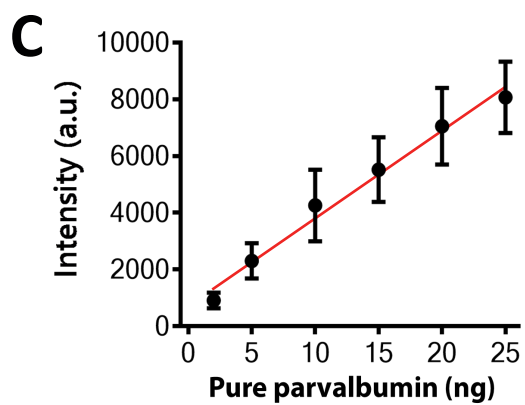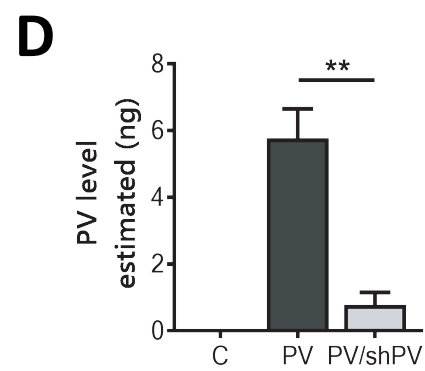

Supplement: 18_2018_2921_MOESM11_ESM.pdf [file 18_2018_2921_MOESM11_ESM.pdf]
